# Supplementary material for: PIP4K2C inhibition reverses autophagic flux impairment induced by SARS-CoV-2
Source: PubMed Central journal article supplement (PMC11042293; doi:10.1101/2024.04.15.589676), 2024-04-17

# Supplementary Fig. 1

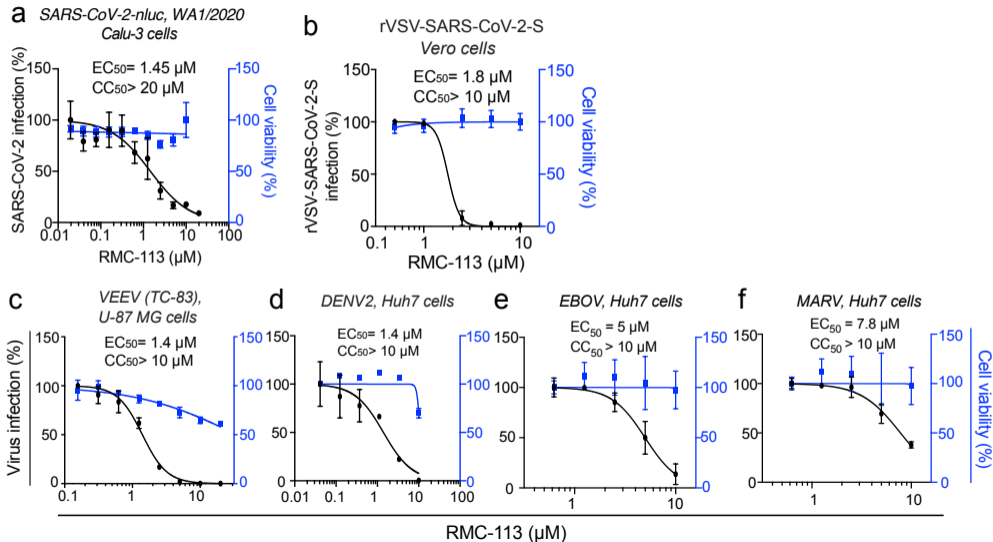

# Supplementary Fig. 2

**a**

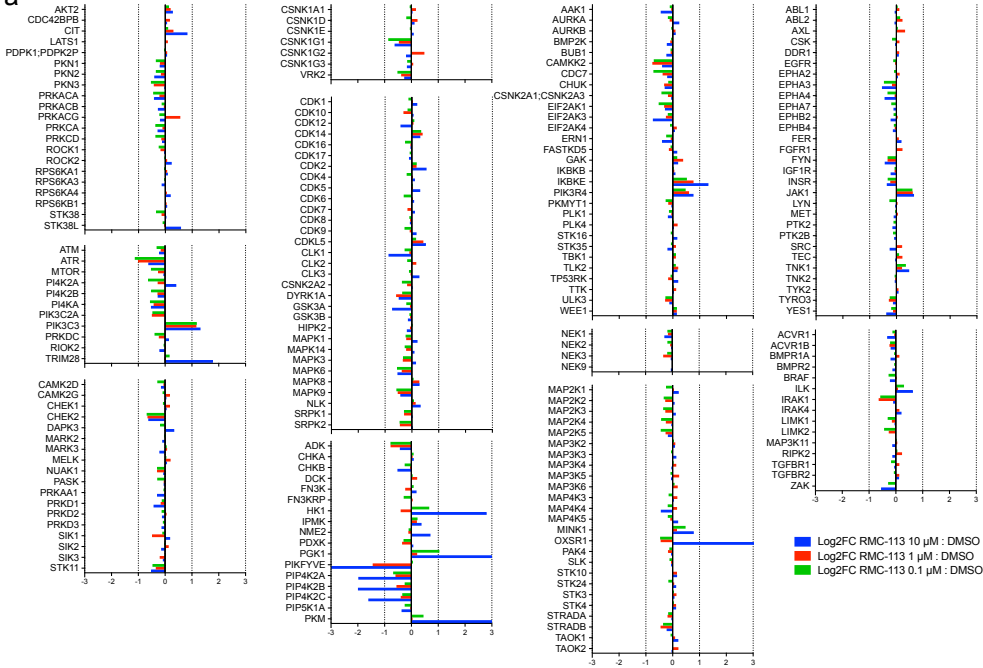

**b**

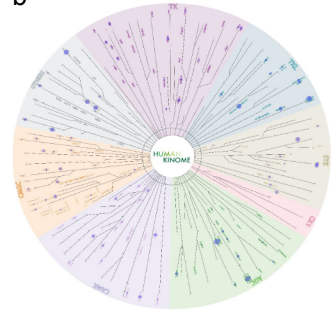

**c**

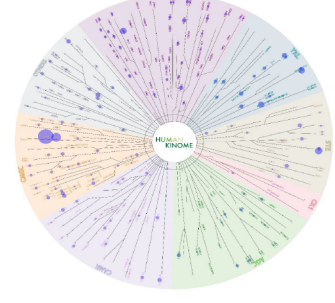

**d**

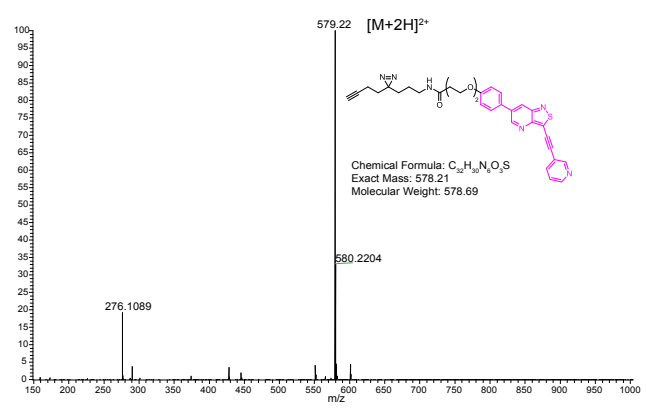

**e**

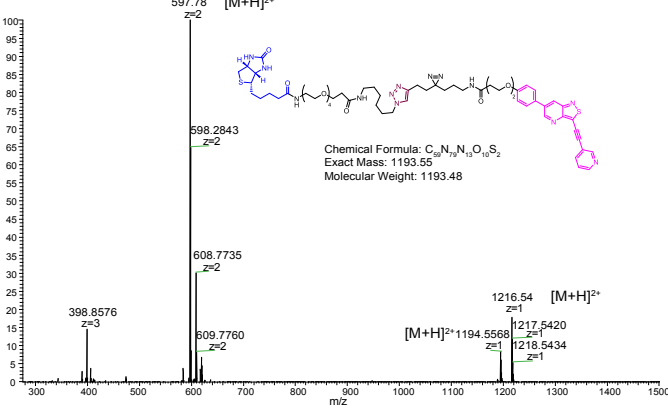

**f**

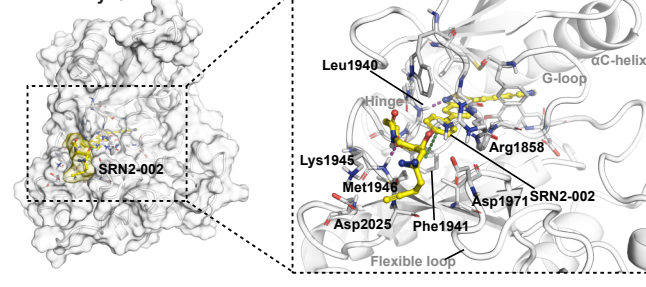

**g**

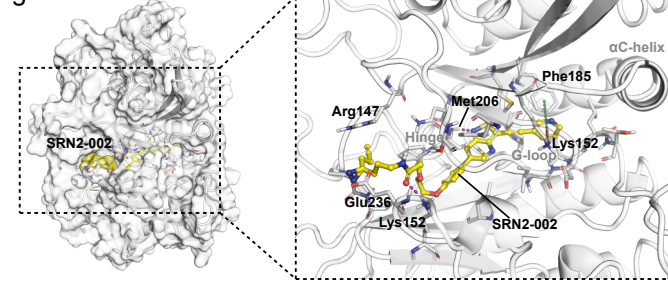

# Supplementary Fig. 3

a

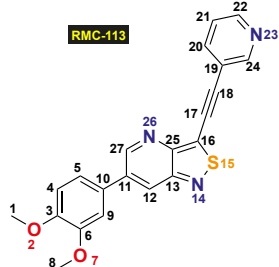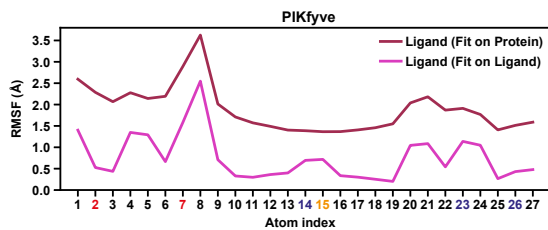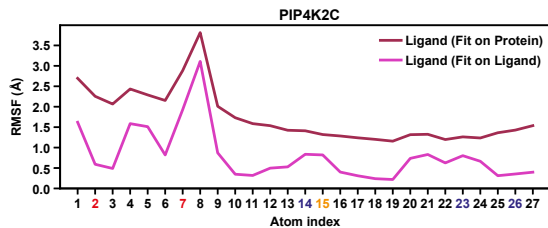

b

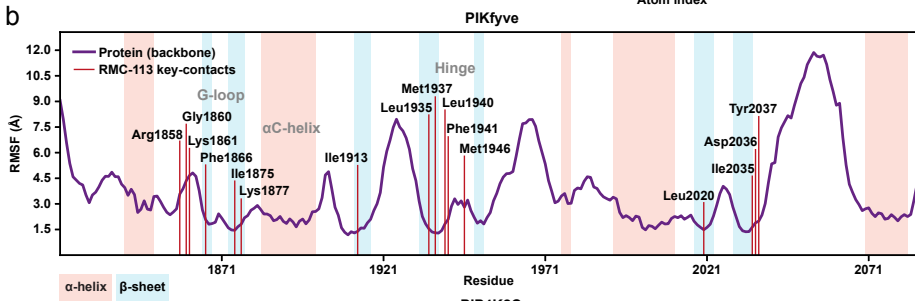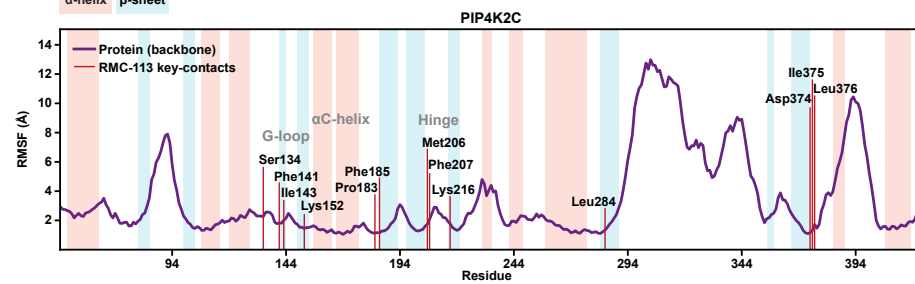

c

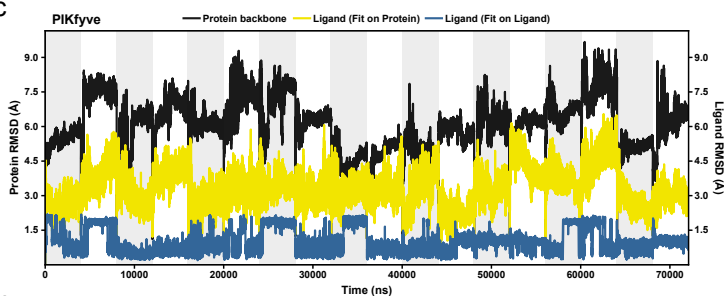

d

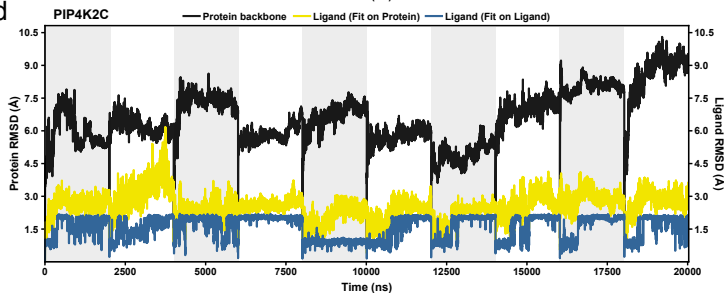

# Supplementary Fig. 4

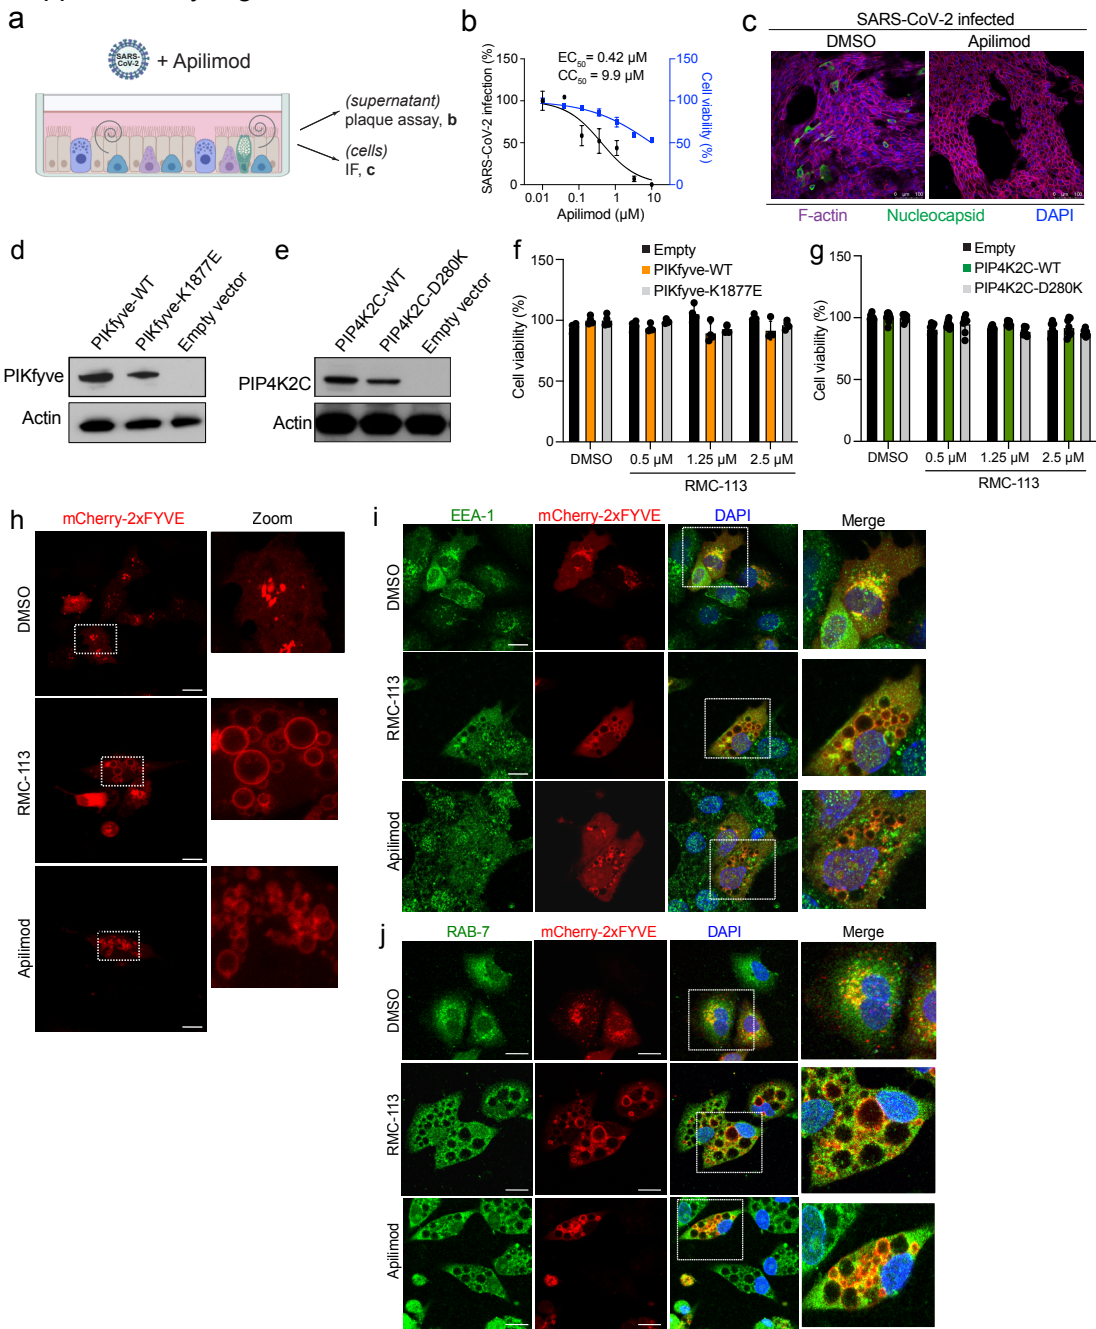

# Supplementary Figure 5

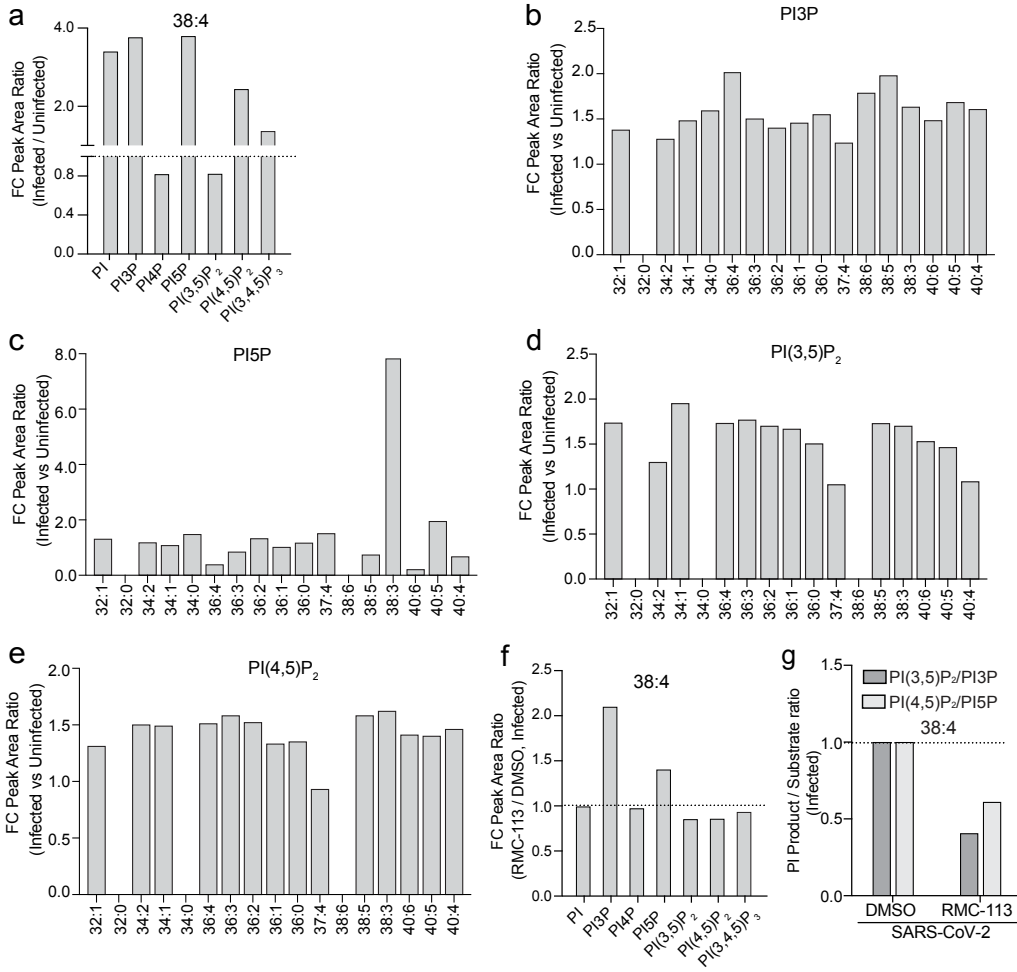

# Supplementary Fig. 6

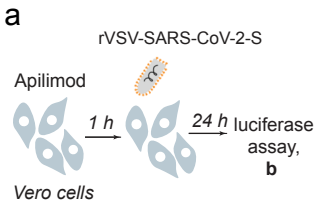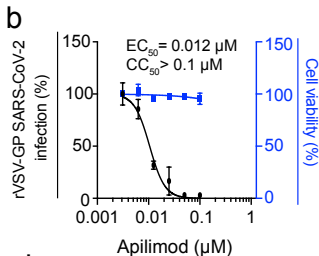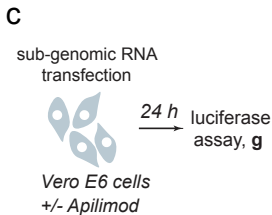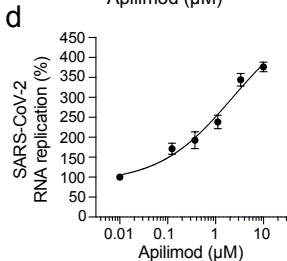

# Supplementary Fig. 7

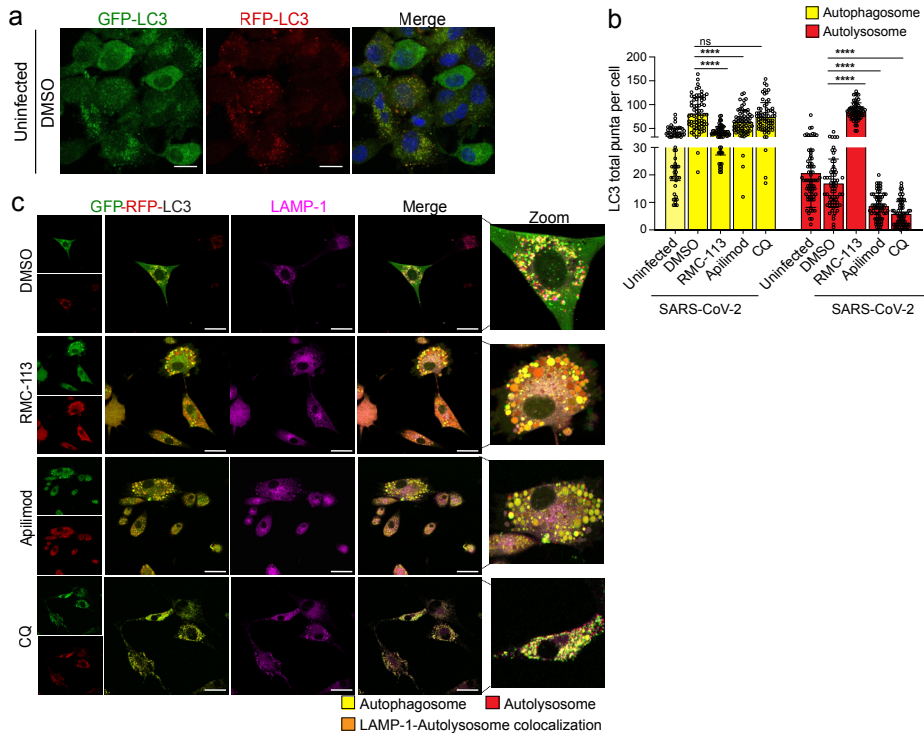

# Supplementary Fig. 8

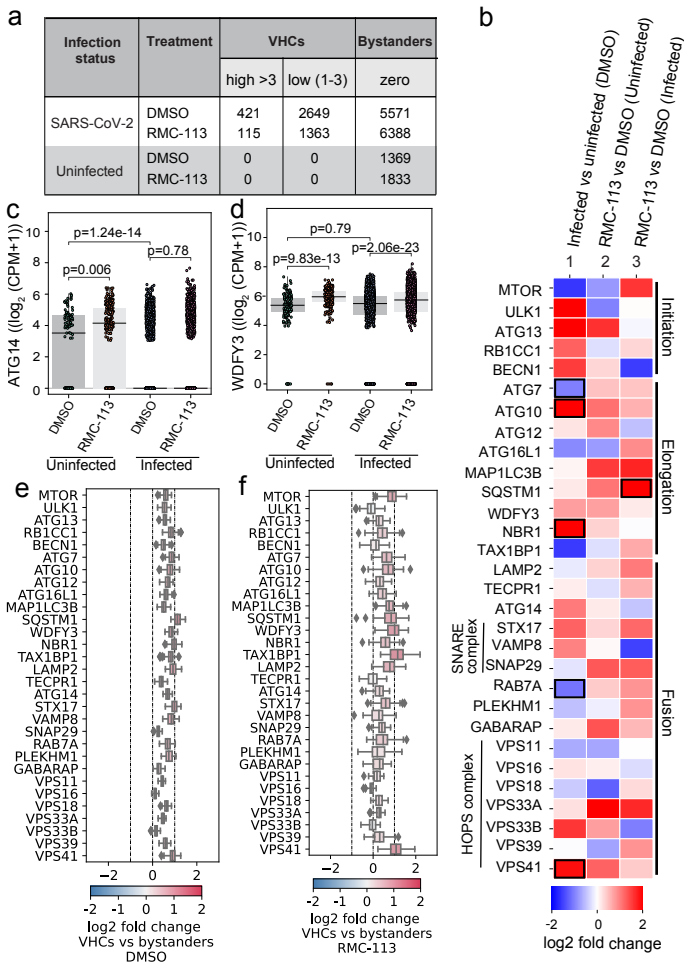



# Supplementary Fig. 9

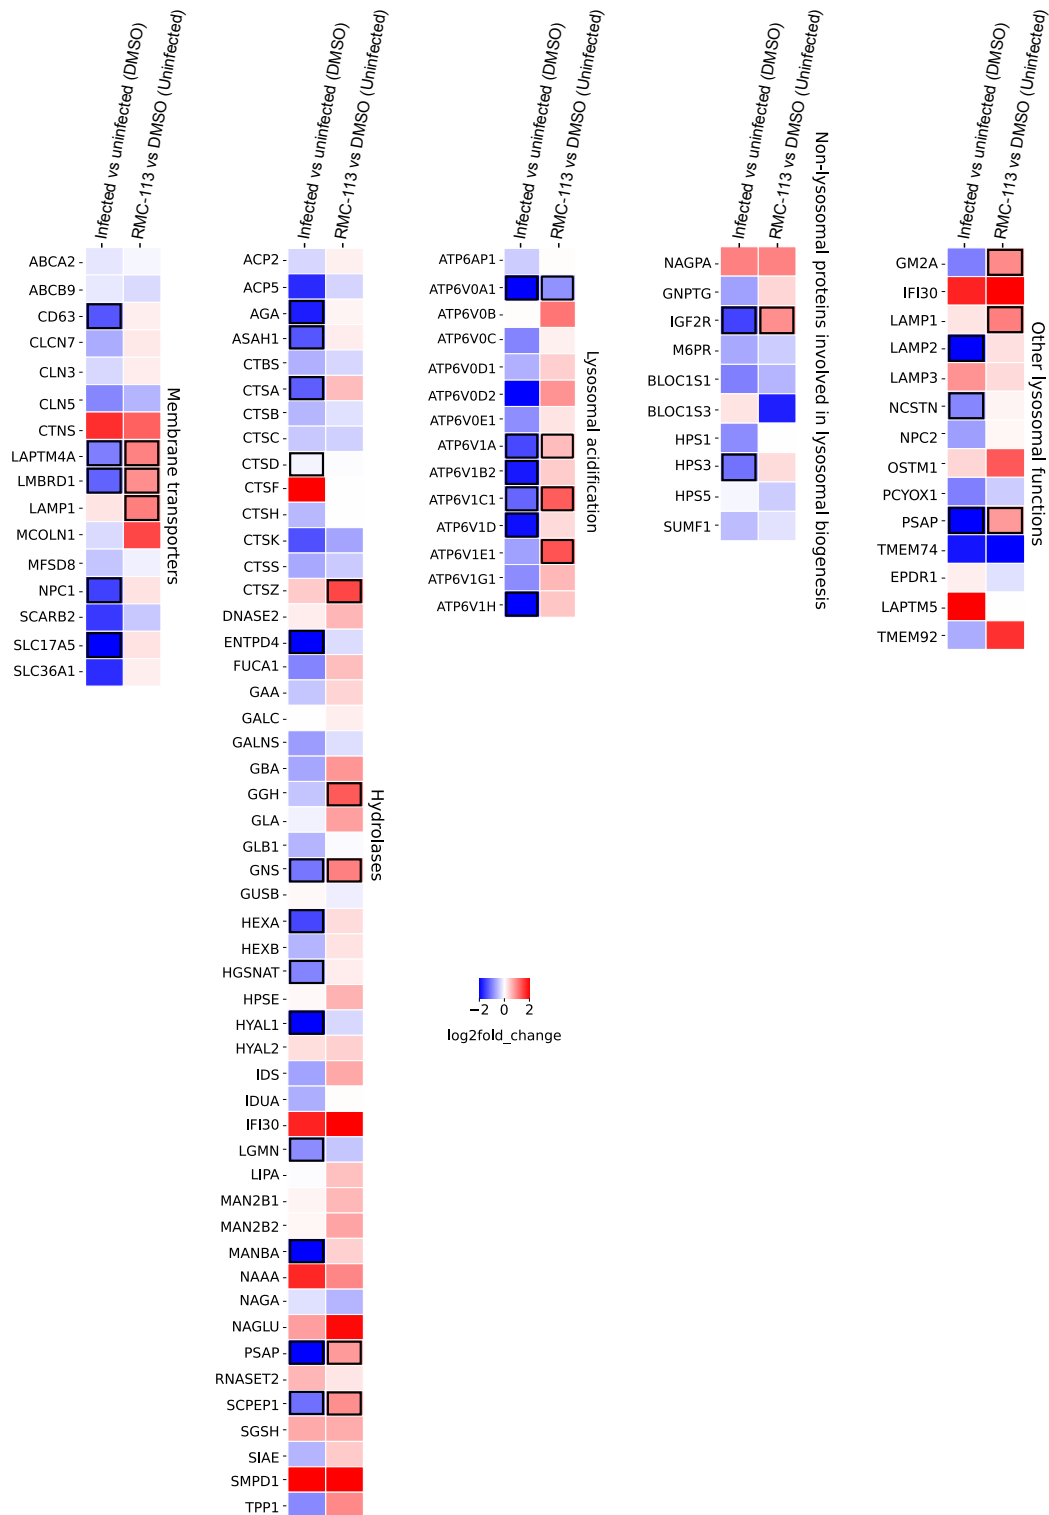

# Supplementary Fig. 10

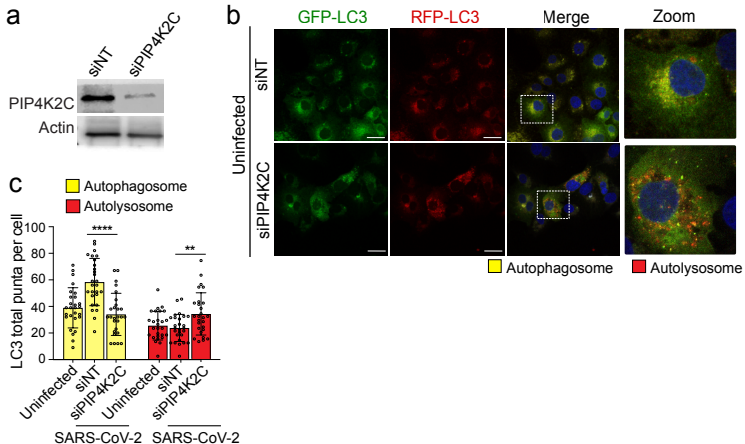

Supplement: media-1.pdf [file media-1.pdf]
